# Supplementary material for: Supramolecular assemblies with water-soluble p-sulfonatothiacalix[6]arene lanthanide complexes: one-dimensional ‘ladder-type’ coordination polymers and one-dimensional hydrogen-bonded polymers
Source: Royal Society of Chemistry journal article supplement (doi:10.1039/c3ce40431e), 2013-01-01
Supplement: c3ce40431e.pdf [file c3ce40431e.pdf]

## Electronic Supporting Information

### Supramolecular assemblies with water-soluble

### *p*-sulfonatothiacalix[6]arene lanthanide complexes: one-dimensional 'ladder-type' coordination polymers and hydrogen-bonded polymers

Manabu Yamada<sup>a\*</sup> and Fumio Hamada<sup>b,\*</sup>

<sup>a</sup> *Center for Geo-Environmental Science (CGES), Graduate School of Engineering and Resource  
Science, Akita University, 1-1 Tegatagakuen-machi, Akita 010-8502*

<sup>b</sup> *Department of Applied Chemistry for Environments, Graduate School of Engineering and Resource  
Science, Akita University, Akita 010-8502, Japan*

\* Corresponding Author: myamada@gipc.akita-u.ac.jp; Fax: +81 18 837 0404. Tel: +81 18 889 2442.

\* Corresponding Author: hamada@gipc.akita-u.ac.jp; Fax: +81 18 837 0404. Tel: +81 18 889 2440.

## **Supporting Information Comprises:**

**Supplementary Table S1** S- $\pi$  interactions as type I in crystals of **I-II** and type II in crystals of **III-VII**.

**Supplementary Table S2** Hydrogen bonding among thiacalixarene, aquated Ln cations, and free water molecules within the pseudo 'up-down' cavities in crystals of **III-VII**.

**Supplementary Figure S1** The molecular structures of complex **I** a) and complex **II** b) showing intramolecular hydrogen bonding and S...O interactions between a base half of unit of three sulfonated phenols and a reversed half unit of three other ones (light blue and pink dotted lines).

**Supplementary Figure S2** The overall crystal structures of complexes a) **I** and b) **II** showing alternately stacking of two different directional layers when viewed along the [101] plane.

**Supplementary Figure S3** The overall crystal structures of complexes a) **I** and b) **II** when viewed along the [011] plane

**Supplementary Figure S4** The enlarged view of the same directional arrayed polymers of a) **I** and b) **II** showing the geometry of S- $\pi$  interactions.

**Supplementary Figure S5** Extended structures of complexes **I** and **II** showing S- $\pi$  interactions and hydrogen bonding between the same directional arrayed polymers (green and light blue dotted lines).

**Supplementary Figure S6** Extended structures of complexes **I** and **II** showing S...S interactions and hydrogen bonding between the different directional arrayed polymers (pink and blue dotted lines).

**Supplementary Figure S7** The typical molecular structure of complexes **III-VII** showing intramolecular hydrogen bonding at a base half of unit of three phenols and a reversed half unit of three other ones (light blue dotted lines).

**Supplementary Figure S8** Hydrogen bonding of thiacalixarene molecule and two aquated lanthanide metal cations in the ‘up-down’ double partial cone cavities of complex **III**; each aquo-metal cation experiences two hydrogen bond interactions between sulfonate groups of the thiacalixarene molecule (light blue dotted lines). Non-coordinated water molecules omitted for clarity.

**Supplementary Figure S9** The enlarged projection showing hydrogen bonding among sulfonate groups of the thiacalixarene molecule, water molecules, and aquo-metal cation in complex **III** (light blue dotted lines). Hydrogen atoms of two disordered water molecules are not considered. Disordered positions of water molecules have been omitted for clarity.

**Supplementary Figure S10** Projection of the thiacalixarene showing intramolecular OH...aromatic  $\pi$  and ArOH...O hydrogen bonding of the water molecules with the thiacalixarene molecule in the pseudo ‘thiacalix[3]arene-like’ cavities of complex **III** (light blue dotted lines).

**Supplementary Figure S11** The overall crystal structures of complex **III** showing alternately stacking of two different directional layers when viewed along the [011] plane.

**Supplementary Figure S12** The bilayer structure of complex **III** when viewed along the [101] plane.

**Supplementary Figure S13** The enlarged view of the same directional arrayed polymers of complex **III** showing the geometry of S- $\pi$  interactions.

**Supplementary Table S1** S- $\pi$  interactions as type I in crystals of **I-II** and type II in crystals of **III-VII**.

|            | $r$ (Å) | $d$ (Å) | $\varphi$ (°) | $\alpha$ (°) | $\alpha'$ (°) |
|------------|---------|---------|---------------|--------------|---------------|
| <b>I</b>   | 3.429   | 3.681   | 88.94         | 92.39        | 127.62        |
| <b>II</b>  | 3.394   | 3.560   | 87.81         | 93.65        | 127.54        |
| <b>III</b> | 3.450   | 3.212   | 68.55         | 92.10        | 166.19        |
| <b>IV</b>  | 3.444   | 3.210   | 68.72         | 92.16        | 166.11        |
| <b>V</b>   | 3.441   | 3.206   | 68.65         | 92.14        | 166.42        |
| <b>VI</b>  | 3.442   | 3.205   | 68.60         | 92.20        | 166.53        |
| <b>VII</b> | 3.684   | 3.401   | 67.08         | 91.29        | 164.67        |

**Supplementary Table S2** Hydrogen bonding among thiacalixarene, aquated Ln cations, and free water molecules within the pseudo ‘up-down’ cavities in crystals of **III-VII**.

|            | Ln-OH...O-SO <sub>2</sub> <sup>1)</sup><br>(Ln-O...O-SO <sub>2</sub> )<br>(Å) | O <sub>2</sub> S-O...O <sup>2)</sup><br>(Å) | HOH...OH <sub>2</sub> <sup>3)</sup><br>(O...O)<br>(Å) | HOH...π <sup>4)</sup><br>(O...π)<br>(Å) | Ar-OH...O <sup>5)</sup><br>(Å) |
|------------|-------------------------------------------------------------------------------|---------------------------------------------|-------------------------------------------------------|-----------------------------------------|--------------------------------|
| <b>III</b> | 1.997, 2.236<br>(2.795, 2.983)                                                | 2.806                                       | 1.883- 1.965<br>(2.681-2.702)                         | 2.532<br>(3.263)                        | 1.923                          |
| <b>IV</b>  | 2.079, 2.207<br>(2.792, 2.985)                                                | 2.797                                       | 1.812-1.971<br>(2.598-2.736)                          | 2.559<br>(3.267)                        | 1.926                          |
| <b>V</b>   | 1.957, 2.158<br>(2.794, 2.987)                                                | 2.816                                       | 1.836-1.950<br>(2.600-2.741)                          | 2.555<br>(3.251)                        | 1.875                          |
| <b>VI</b>  | -<br>(2.780, 2.984)                                                           | 2.827                                       | -<br>(2.600-2.757)                                    | -<br>(3.273)                            | 1.919                          |
| <b>VII</b> | -<br>(2.706, 2.739)                                                           | 2.852                                       | -<br>(2.638-3.025)                                    | -<br>(3.344)                            | 2.079                          |

- 1) Hydrogen bonding between aquo-metal cations and sulfonate groups of the thiacalixarene. In **VI-VII**, hydrogen atoms of coordinated water molecules and free water molecules were not considered.
- 2) Hydrogen bonding between sulfonate group of the thiacalixarene and imbedded disordered water molecule (hydrogen atoms of the disordered water molecules are not considered).
- 3) Hydrogen bonding between imbedded disordered water molecules and coordinated water molecules of aquated lanthanide metal cations. In **VI-VII**, hydrogen atoms of coordinated water molecules and free water molecules were not considered.
- 4) OH-aromatic π hydrogen bonding between imbedded water molecules and aromatic moieties in the thiacalixarene molecule. In **VI-VII**, hydrogen atoms of coordinated water molecules and free water molecules were not considered.
- 5) Hydrogen bonding between the pendent phenolic hydroxyl group and embedded water molecule in each cavity.

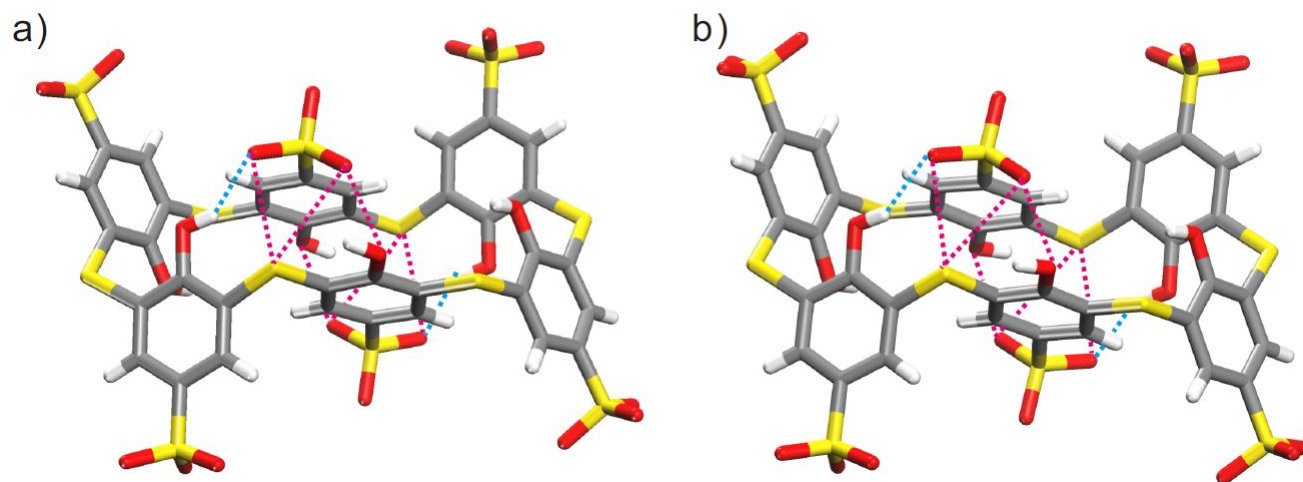

**Supplementary Figure S1** The molecular structures of complex **I** a) and complex **II** b) showing intramolecular hydrogen bonding and S...O interactions between a base half of unit of three sulfonated phenols and a reversed half unit of three other ones (light blue and pink dotted lines). Selected distances of complex **I**: SO...O-Ar 3.232 Å, SO...HO-Ar 2.051 Å, SO...S 3.384 and 3.468 Å. Selected distances of complex **II**: SO...O-Ar 3.138 Å, SO...HO-Ar 2.103 Å, SO...S 3.367 and 3.429 Å.

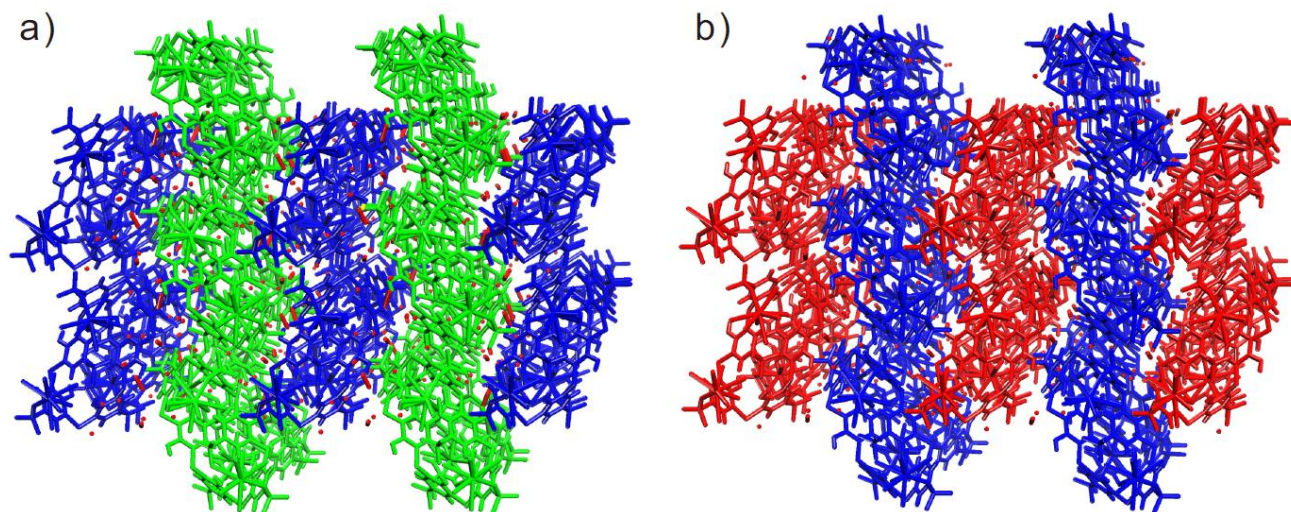

**Supplementary Figure S2** The overall crystal structures of complexes a) **I** and b) **II** showing alternately stacking of two different directional layers when viewed along the [101] plane.

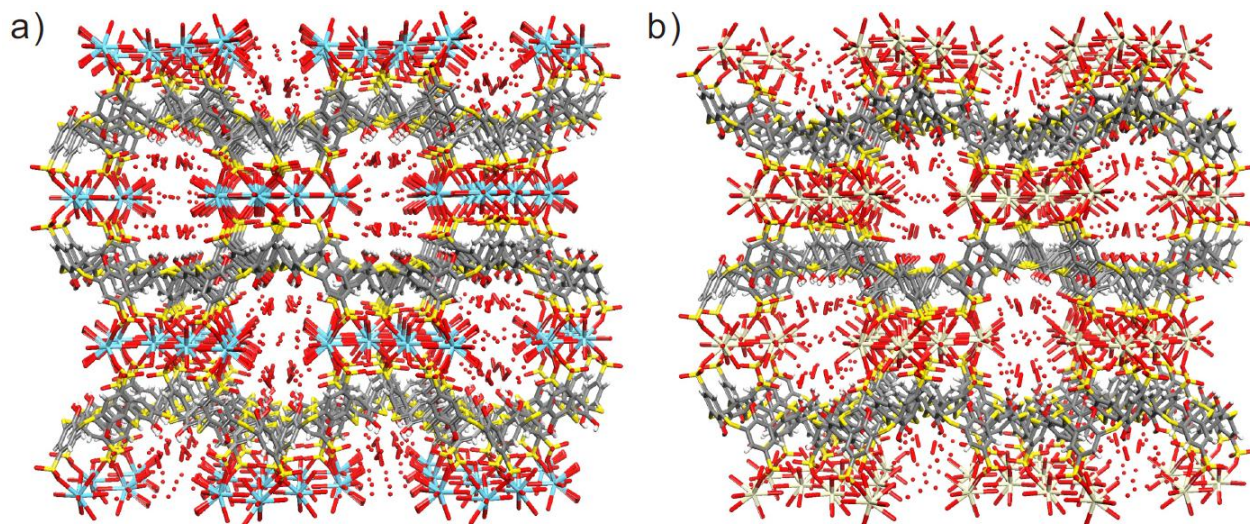

**Supplementary Figure S3** The overall crystal structures of complexes a) **I** and b) **II** when viewed along the [011] plane.



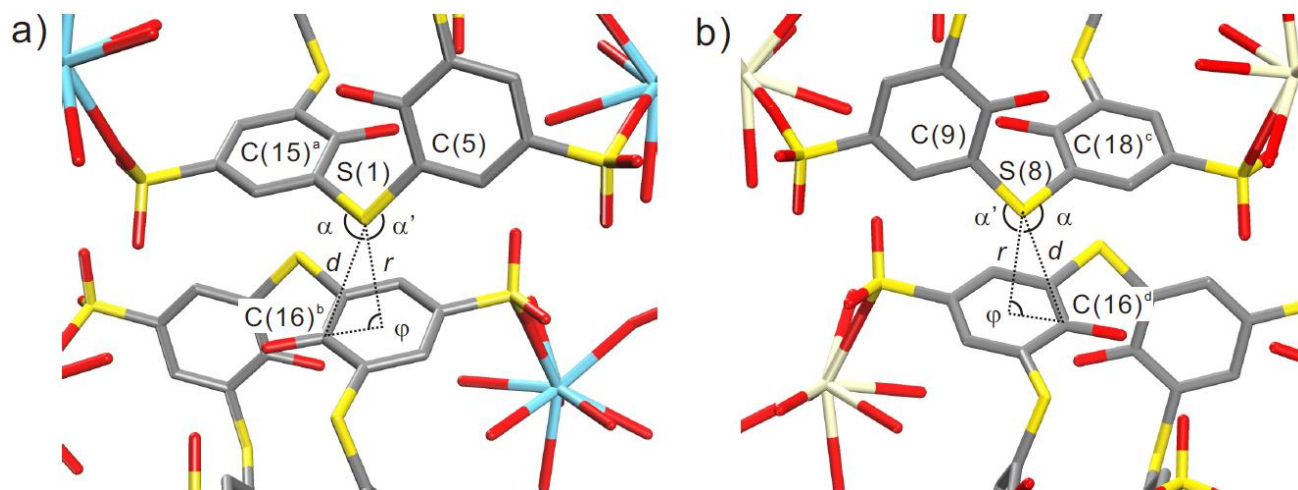

**Supplementary Figure S4** The enlarged view of the same directional arrayed polymers of a) **I** and

b) **II** showing the geometry of S- $\pi$  interactions. Selected distances and angles of complex **I**:

S(1)···centroid ( $r$ ) 3.429 Å, S(1)···C(16)<sup>c</sup> ( $d$ ) 3.681 Å, C(15)<sup>a</sup>-S(1)-centroid ( $\alpha$ ) 92.39° and

C(5)-S(1)-centroid ( $\alpha'$ ) 127.62°, and S(1)-centroid-C(16)<sup>b</sup> ( $\varphi$ ) 88.94°. Selected distances and angles

of complex **II**: S(8)···centroid ( $r$ ) 3.394 Å, S(8)···C(16)<sup>d</sup> ( $d$ ) 3.600 Å, C(18)<sup>c</sup>-S(8)-centroid ( $\alpha$ )

93.65° and C(9)-S(8)-centroid ( $\alpha'$ ) 127.54°, and S(8)-centroid-C(16)<sup>d</sup> ( $\varphi$ ) 87.81°. Symmetry codes: <sup>a</sup>,

1-x, 1-y, 2-z; <sup>b</sup>, -1+x, y, z; <sup>c</sup>, 1-x, 1-y, 1-z; <sup>d</sup>, 1+x, y, z.

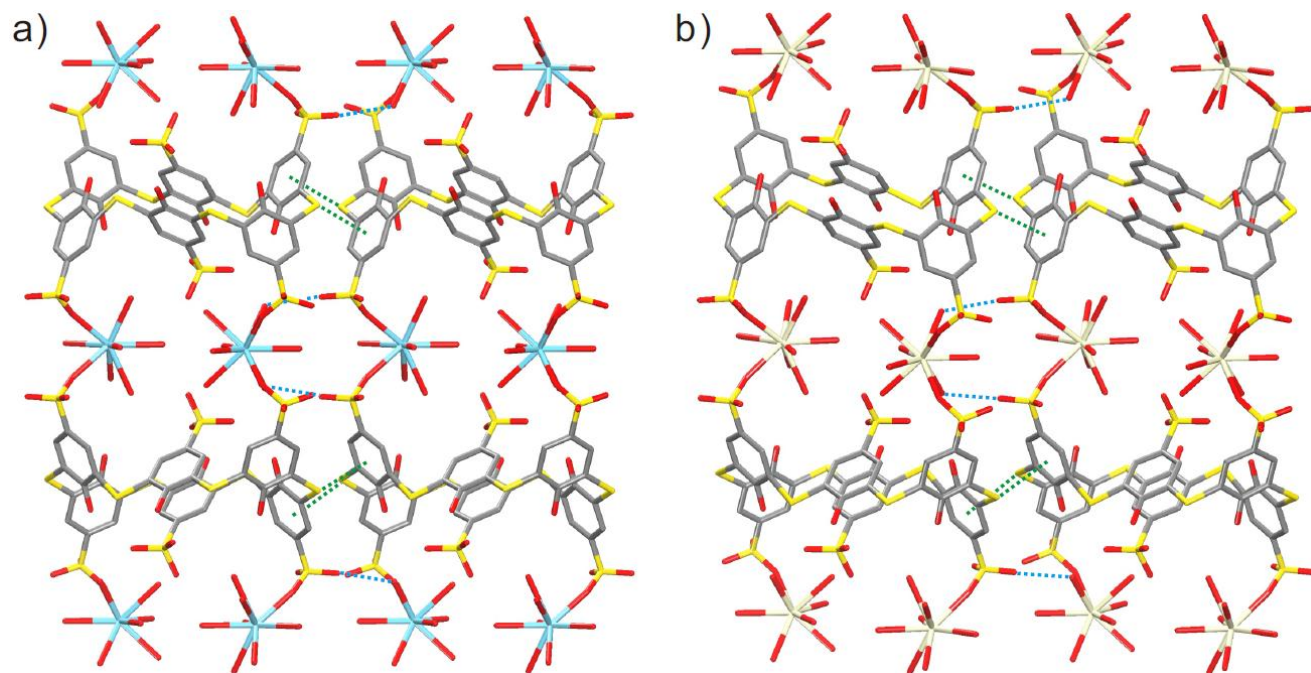

**Supplementary Figure S5** Extended structures of complexes **I** and **II** showing S- $\pi$  interactions and hydrogen bonding between the same directional arrayed polymers (green and light blue dotted lines).

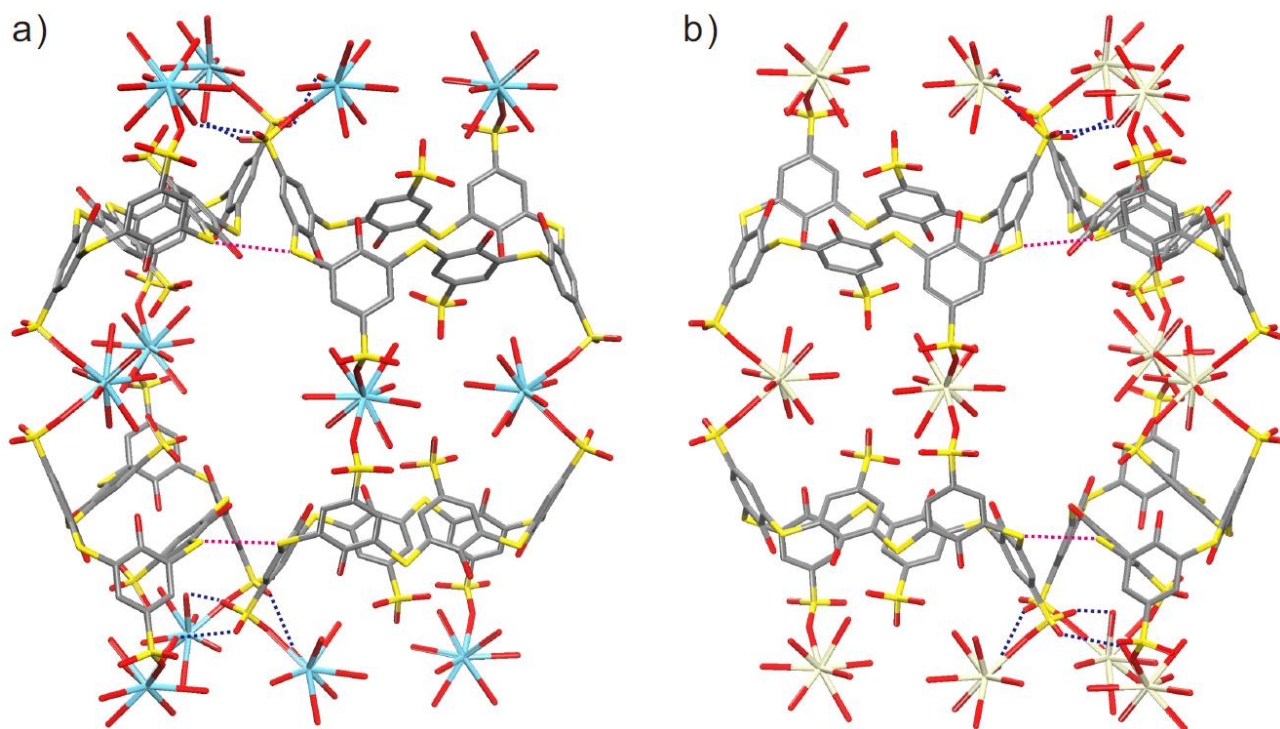

**Supplementary Figure S6** Extended structures of complexes **I** and **II** showing S...S interactions and hydrogen bonding between the different directional arrayed polymers (pink and blue dotted lines).

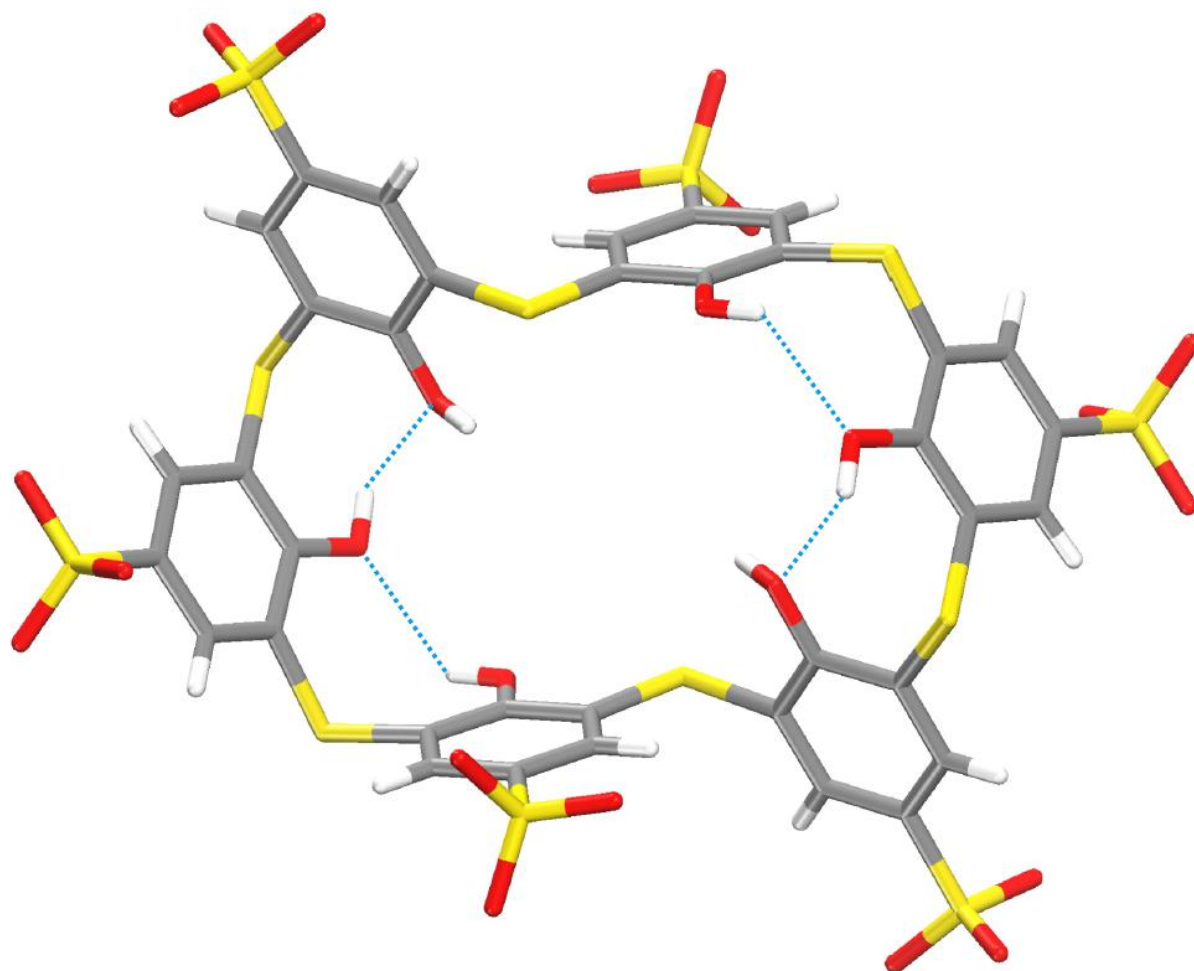

**Supplementary Figure S7** The typical molecular structure of complexes **III-VII** showing intramolecular hydrogen bonding at a base half of unit of three phenols and a reversed half unit of three other ones (light blue dotted lines).

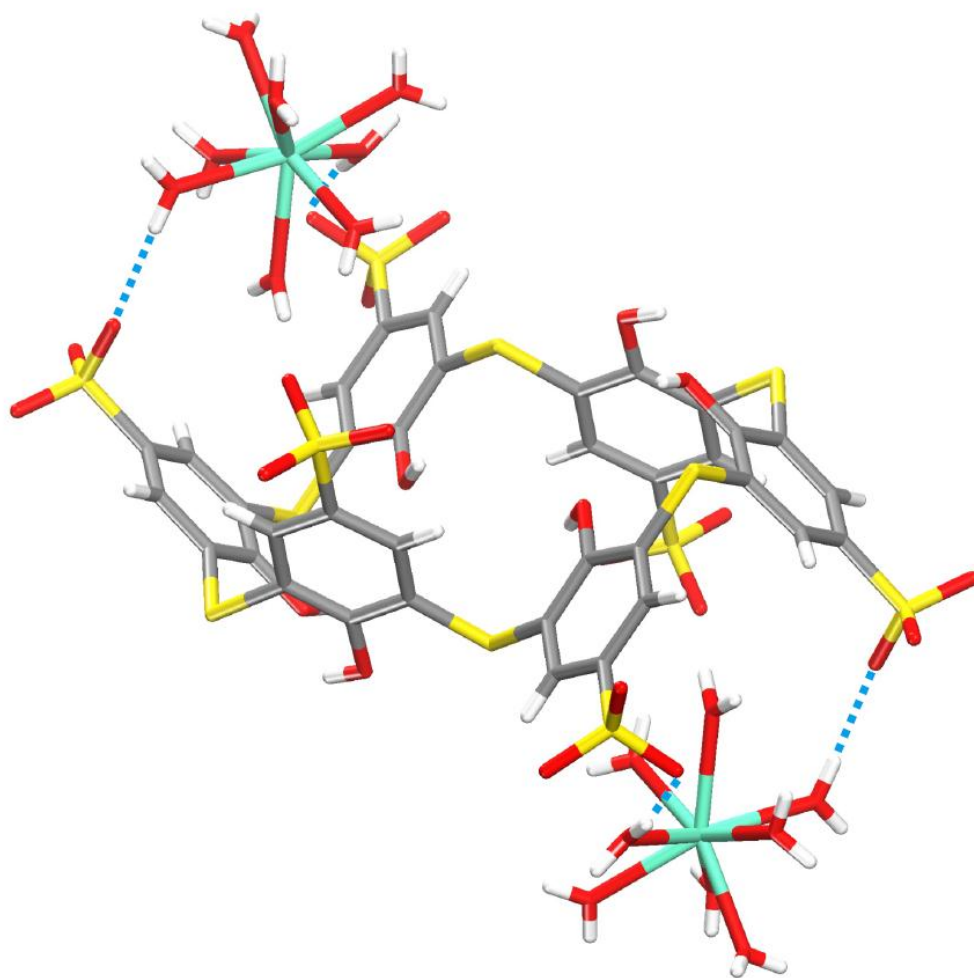

**Supplementary Figure S8** Hydrogen bonding of thiacalixarene molecule and two aquated lanthanide metal cations in the ‘up-down’ double partial cone cavities of complex **III**; each aquo-metal cation experiences two hydrogen bond interactions between sulfonate groups of the thiacalixarene molecule (light blue dotted lines). Non-coordinated water molecules omitted for clarity.

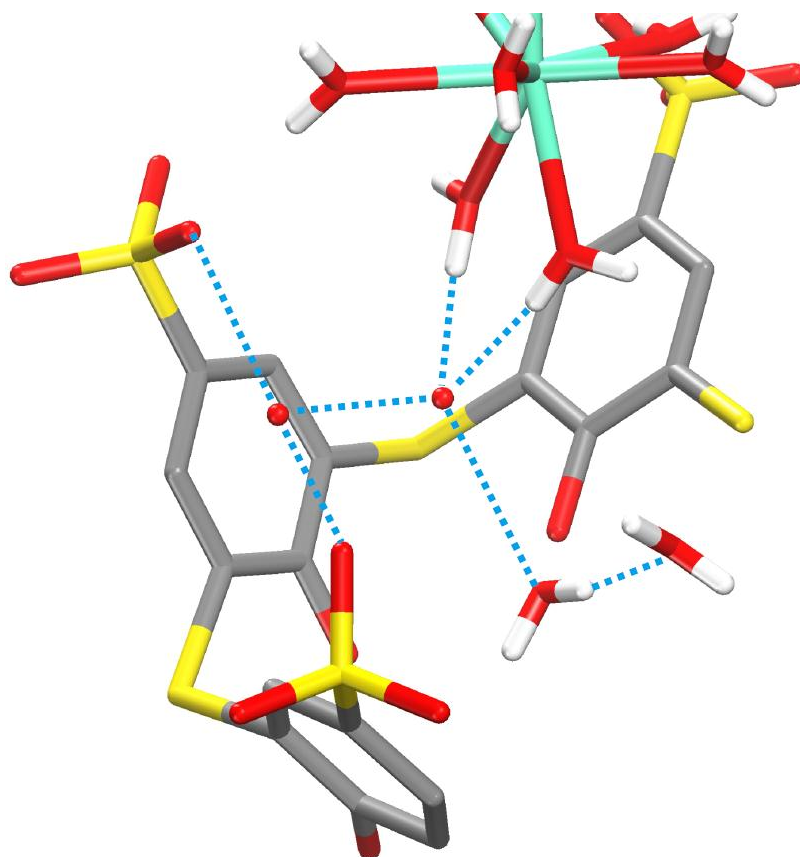

**Supplementary Figure S9** The enlarged projection showing hydrogen bonding among sulfonate groups of the thiacalixarene molecule, water molecules, and aquo-metal cation in complex **III** (light blue dotted lines). Hydrogen atoms of two disordered water molecules are not considered. Disordered positions of water molecules have been omitted for clarity.

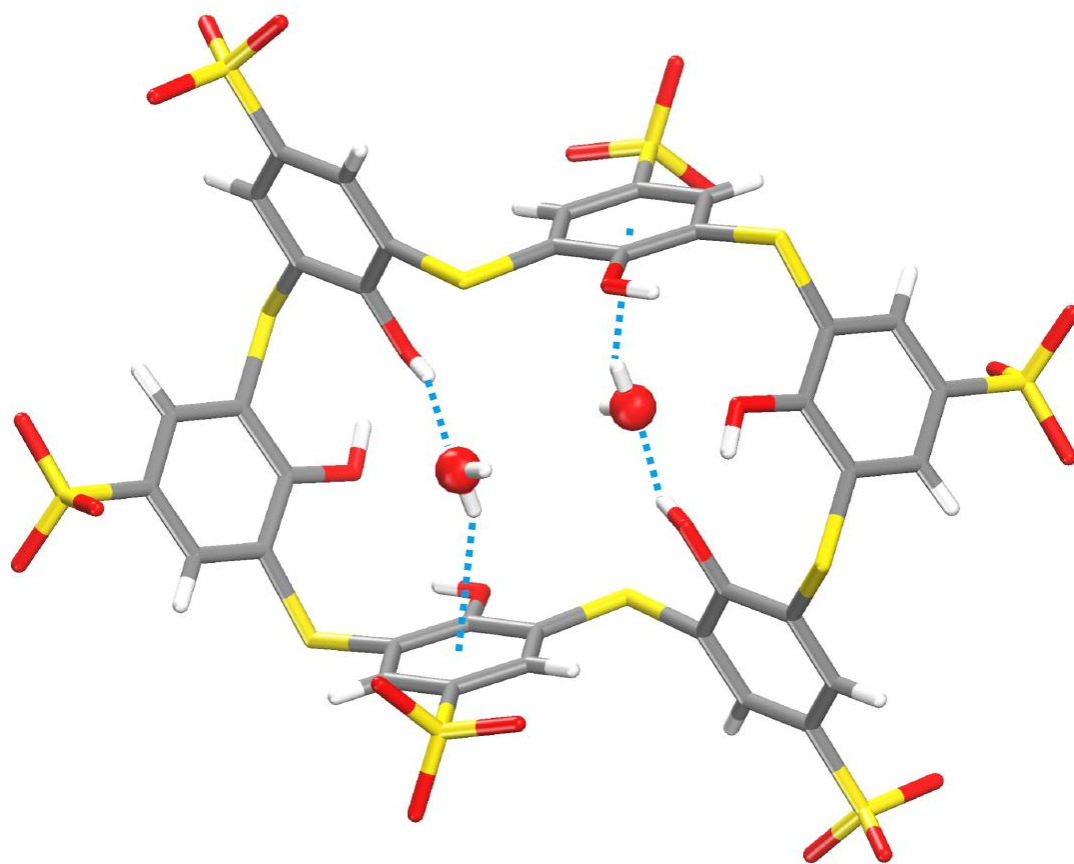

**Supplementary Figure S10** Projection of the thiacalixarene showing intramolecular OH $\cdots$ aromatic  $\pi$  and ArOH $\cdots$ O hydrogen bonding of the water molecules with the thiacalixarene molecule in the pseudo ‘thiacalix[3]arene-like’ cavities of complex **III** (light blue dotted lines).

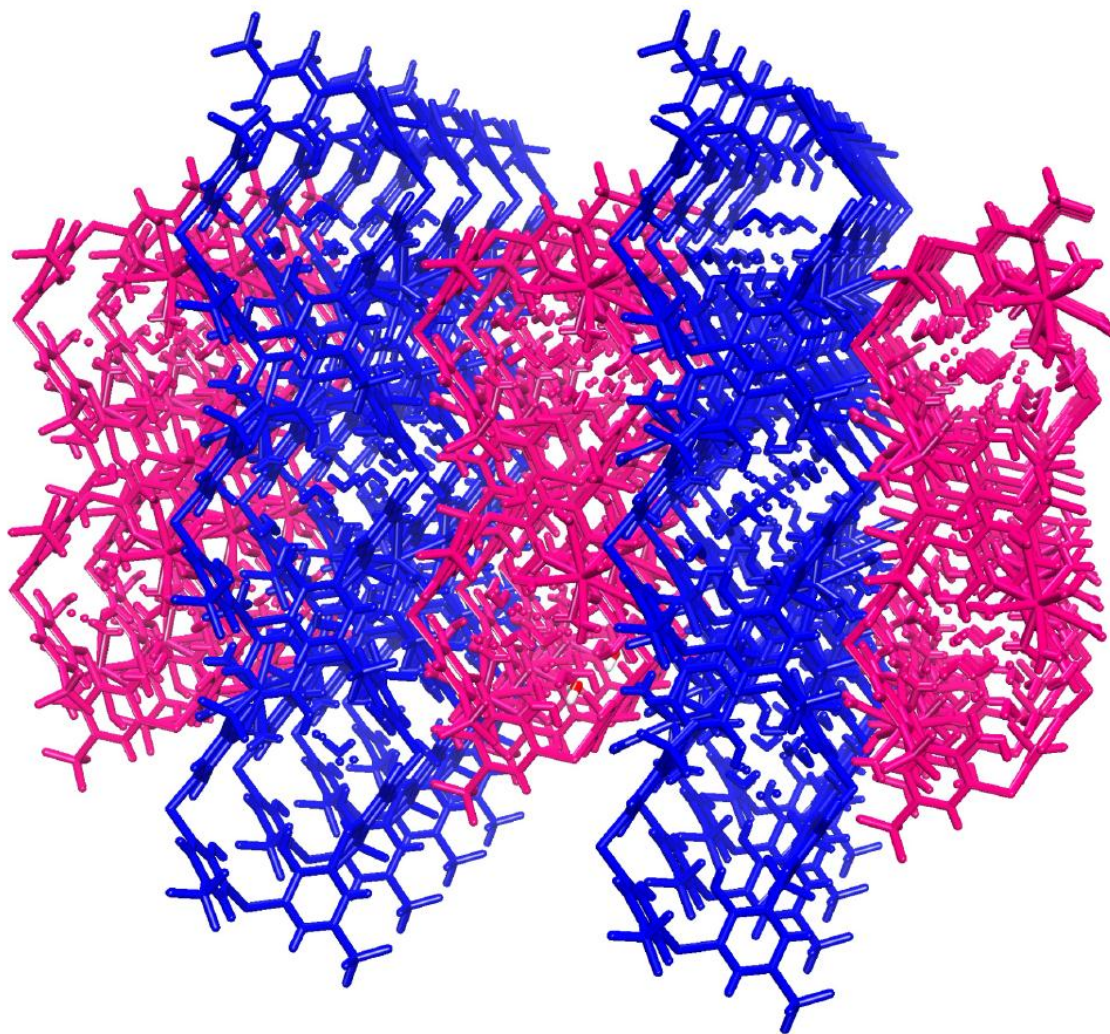

**Supplementary Figure S11** The overall crystal structures of complex **III** showing alternately stacking of two different directional layers when viewed along the [011] plane.



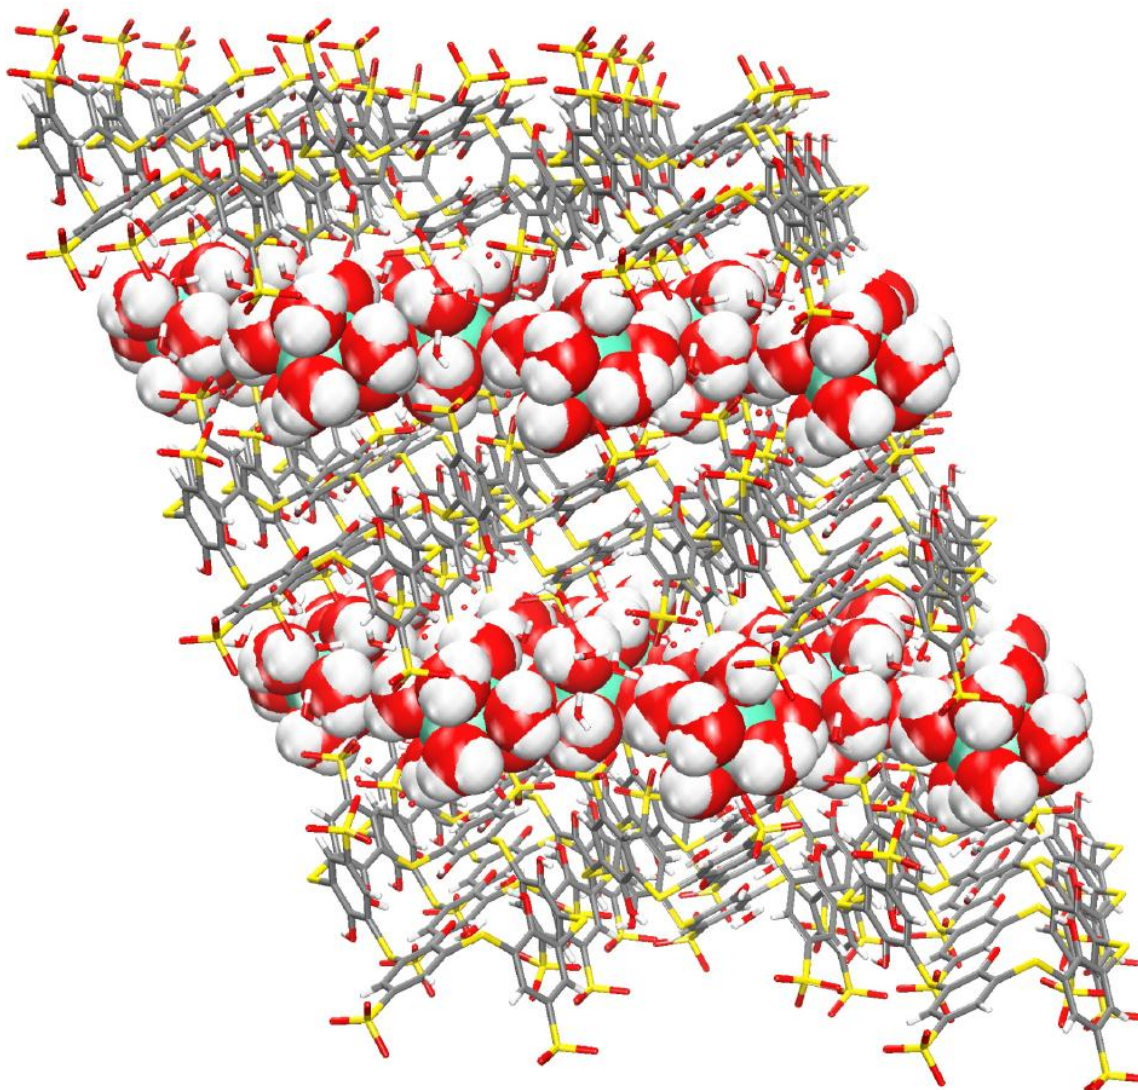

**Supplementary Figure S12** The bilayer structure of complex **III** when viewed along the [101] plane.

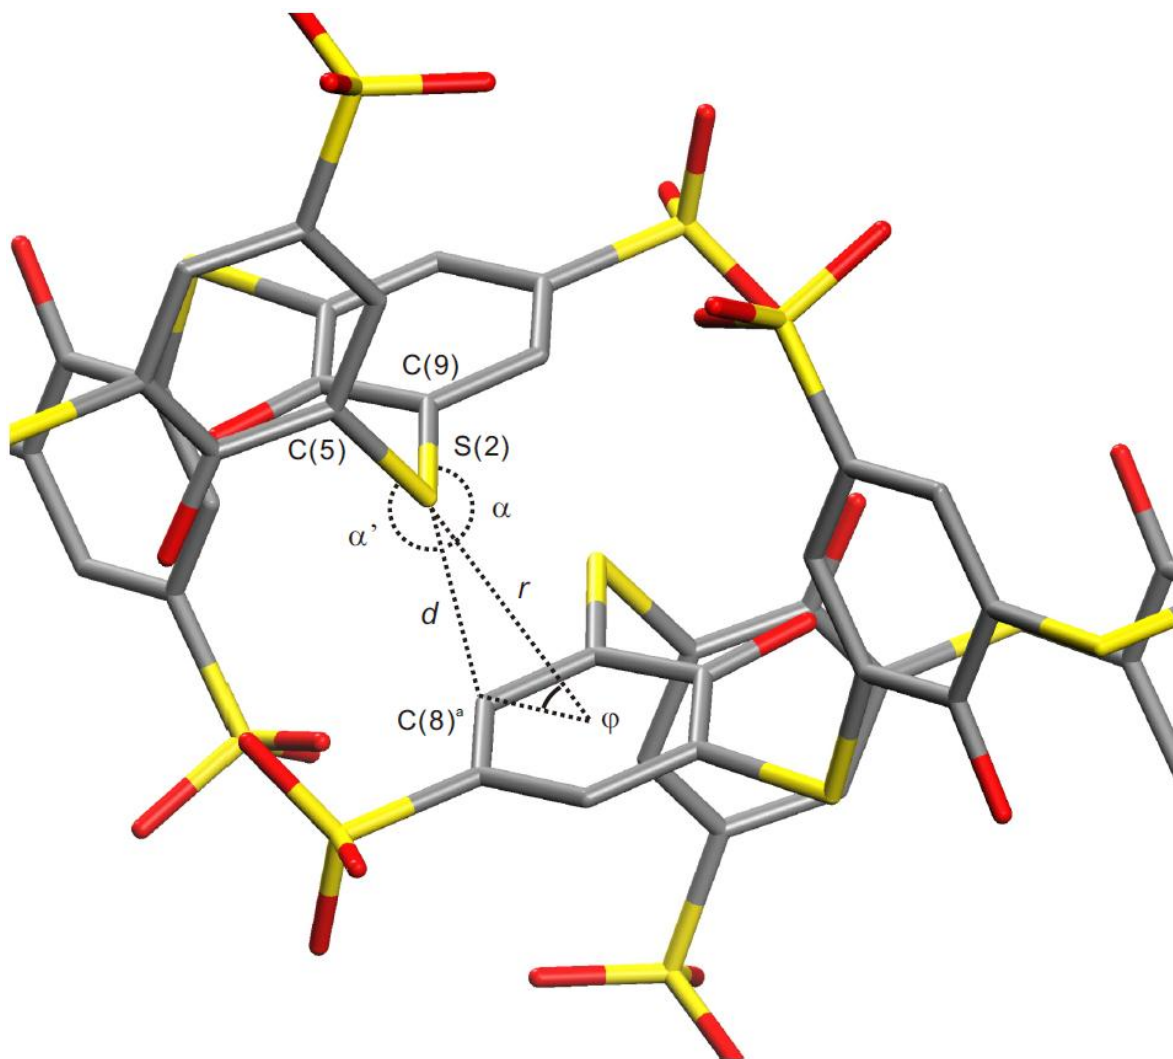

**Supplementary Figure S13** The enlarged view of the same directional arrayed polymers of complex **III** showing the geometry of S- $\pi$  interactions. Selected distances and angles: S(2)···centroid ( $r$ ) 3.450 Å, S(2)···C(8)<sup>a</sup> ( $d$ ) 3.285 Å, C(9)-S(2)-centroid ( $\alpha$ ) 92.10° and C(5)-S(2)-centroid ( $\alpha'$ ) 166.15°, and S(1)-centroid-C(16)<sup>b</sup> ( $\varphi$ ) 71.46°. Symmetry code: <sup>a</sup>, 1-x, -y, 1-z.
